# Supplementary material
Source: PubMed Central journal article supplement (PMC7687866)
Supplement: NIHMS1597029-supplement-Supporting_Information.pdf [file NIHMS1597029-supplement-Supporting_Information.pdf]

## Supporting information

### An Experimental Single-Platform Approach to Enhance Functionalization of Magnetically Targetable Cells

Mark R. Battig<sup>1</sup>, Ivan S. Alferiev<sup>1</sup>, David T. Guerrero<sup>1</sup>, Ilia Fishbein<sup>1</sup>, Benjamin B. Pressly<sup>1</sup>, Robert J. Levy<sup>1</sup>,  
Michael Chorny<sup>1\*</sup>

<sup>1</sup> Department of Pediatrics, The Children's Hospital of Philadelphia, Philadelphia, PA 19104, USA

\* Corresponding author:

Michael Chorny, Ph.D.

The Children's Hospital of Philadelphia,

Abramson Research Building, Suite 702,

3615 Civic Center Boulevard,

Philadelphia, PA 19104-4318;

e-mail: [chorny@email.chop.edu](mailto:chorny@email.chop.edu)

tel: (215) 590 3063

fax: (215) 590 5454

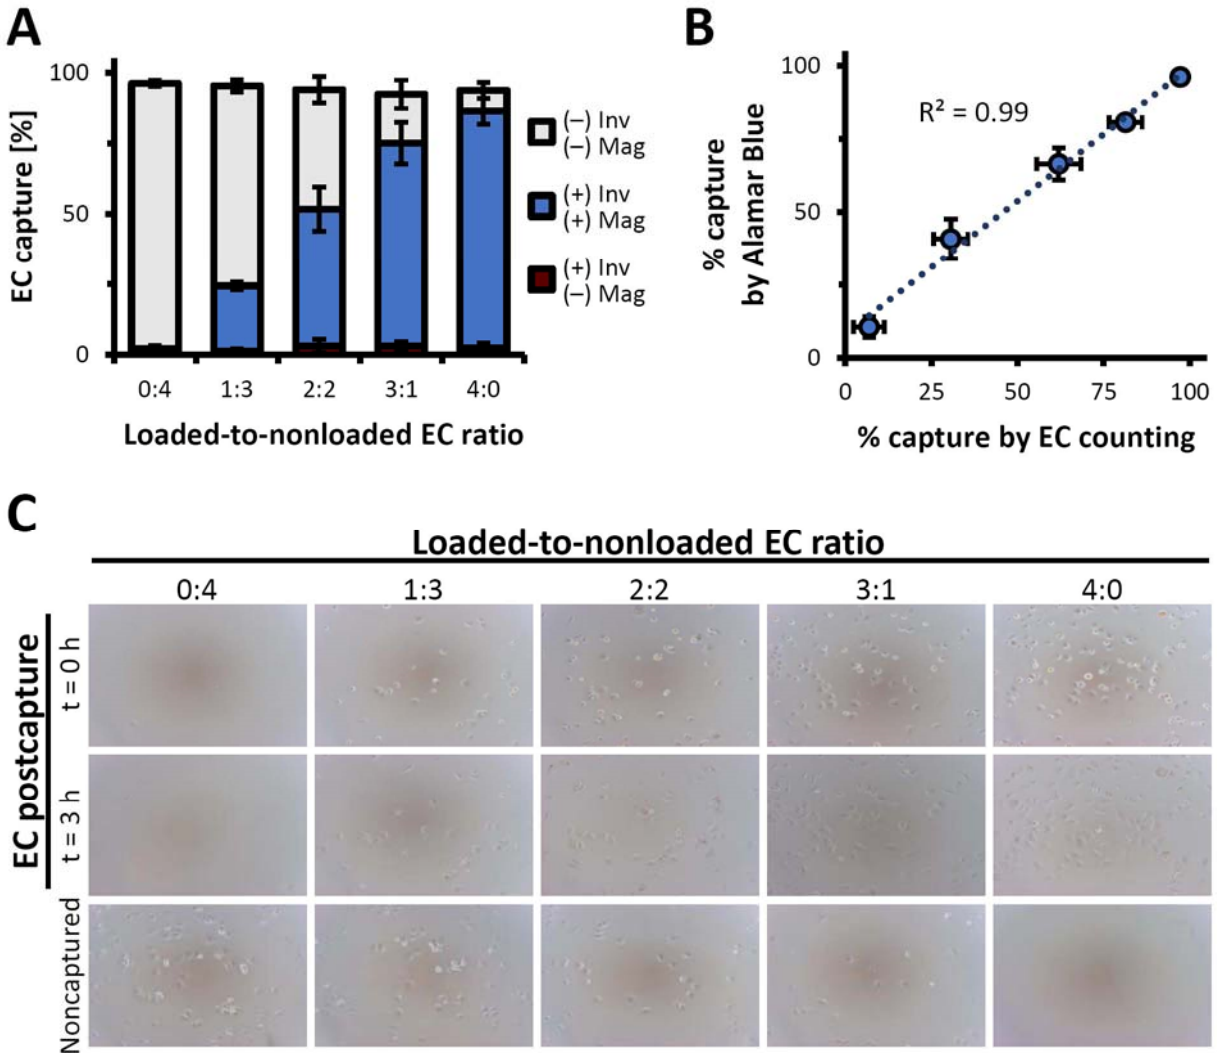

**Figure S1.** Validation of performance and specificity of the inverted-plate assay for the characterization of cells functionalized with MNP for magnetic guidance. **(A)** EC capture from binary suspensions comprised of MNP-loaded and non-loaded EC admixed at various ratios, with or without plate inversion (+/- Inv) or exposure to the magnetic field (+/- Mag) for 30 min. **(B)** Quantification of captured EC by the Alamar Blue assay vs. manual cell counting. **(C)** Representative micrographs of captured EC taken 0 and 3 hr after a 30-min exposure to the magnetic field, showing stable cell attachment and spreading. Non-captured EC remaining in suspension after exposure to the magnetic field were plated and imaged 30 min later.

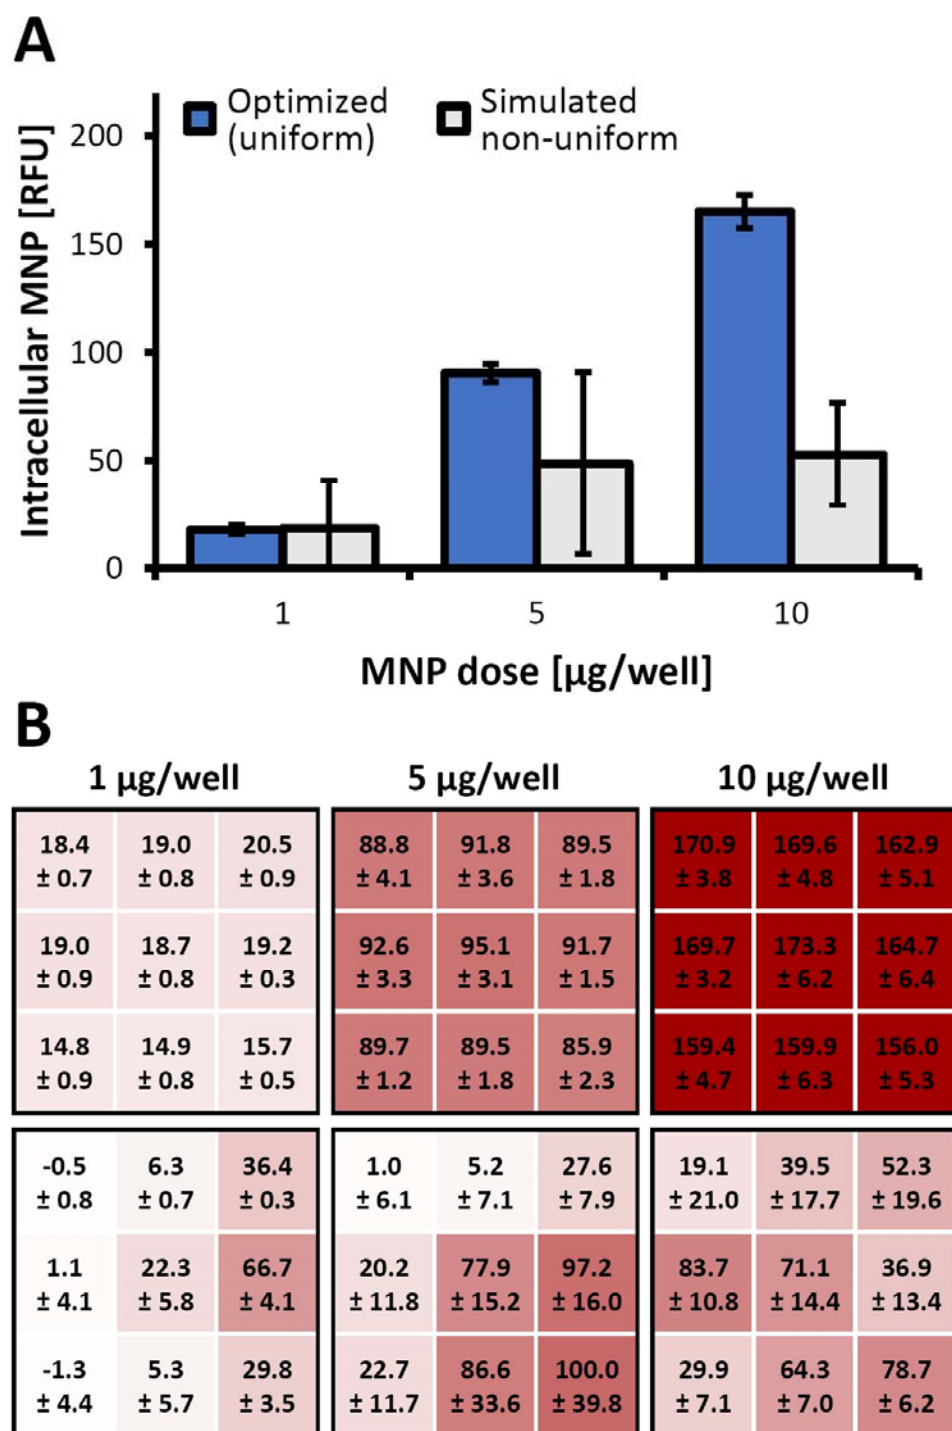

**Figure S2.** Detailed fluorimetric analysis of the uniformity of cell loading with MNP. **(A)** Intracellular MNP-associated fluorescent signal averaged from nine fluorimetric measurements throughout the well. **(B)** Local fluorescence intensities comparatively showing distribution of MNP throughout the well for cells loaded using the uniform vs. non-uniform processes. The color intensity corresponds to the fluorescent signal.

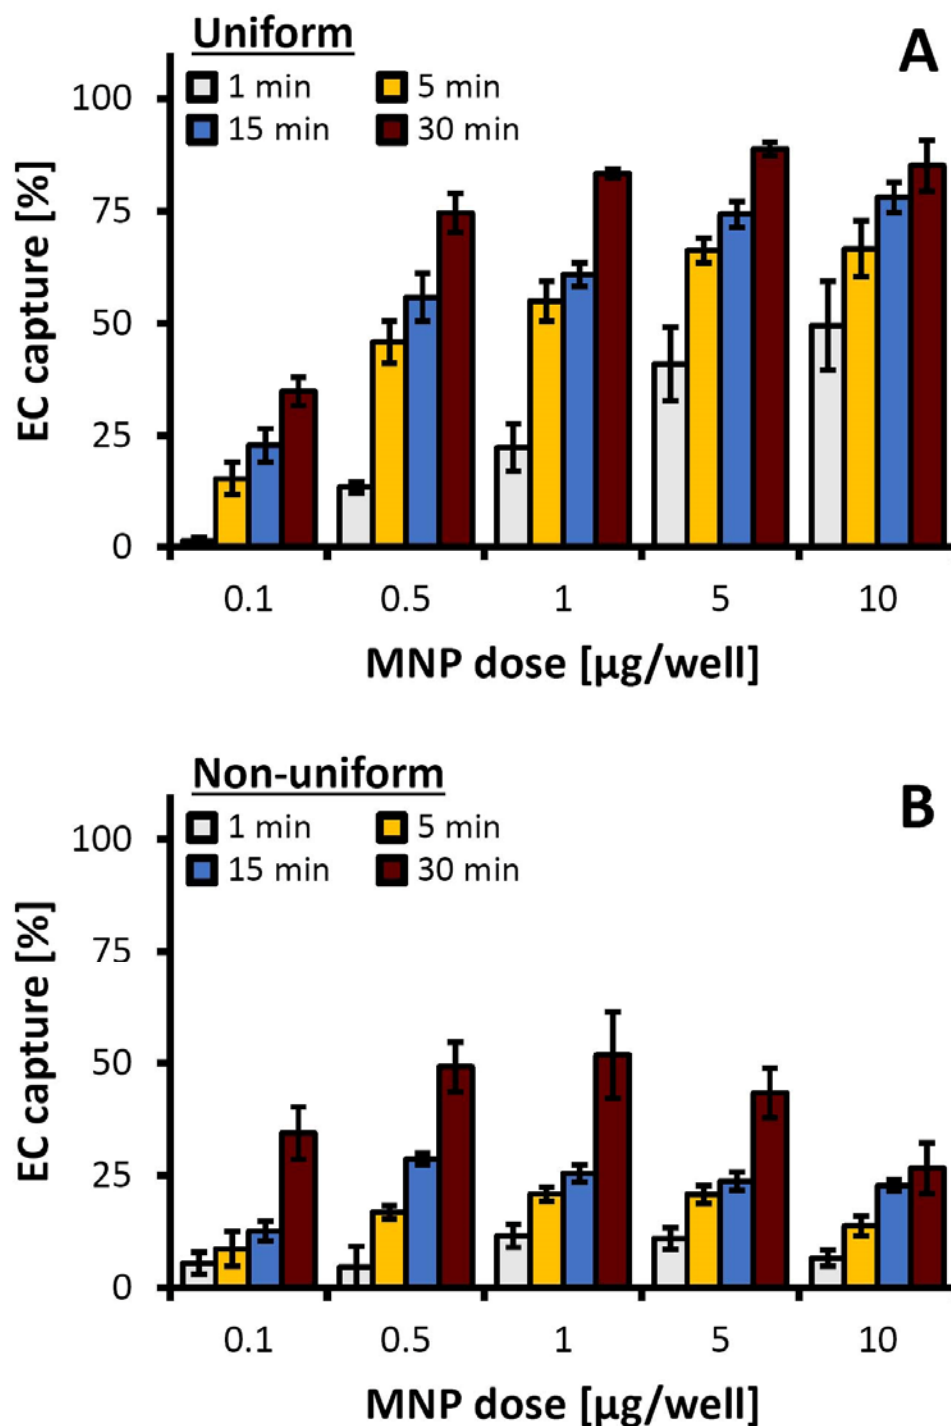

**Figure S3.** EC capture *via* the inverted-plate assay for EC loaded using (top) the optimized (uniform) procedure and (bottom) the simulated, non-uniform procedure as a function of MNP dose and exposure duration.

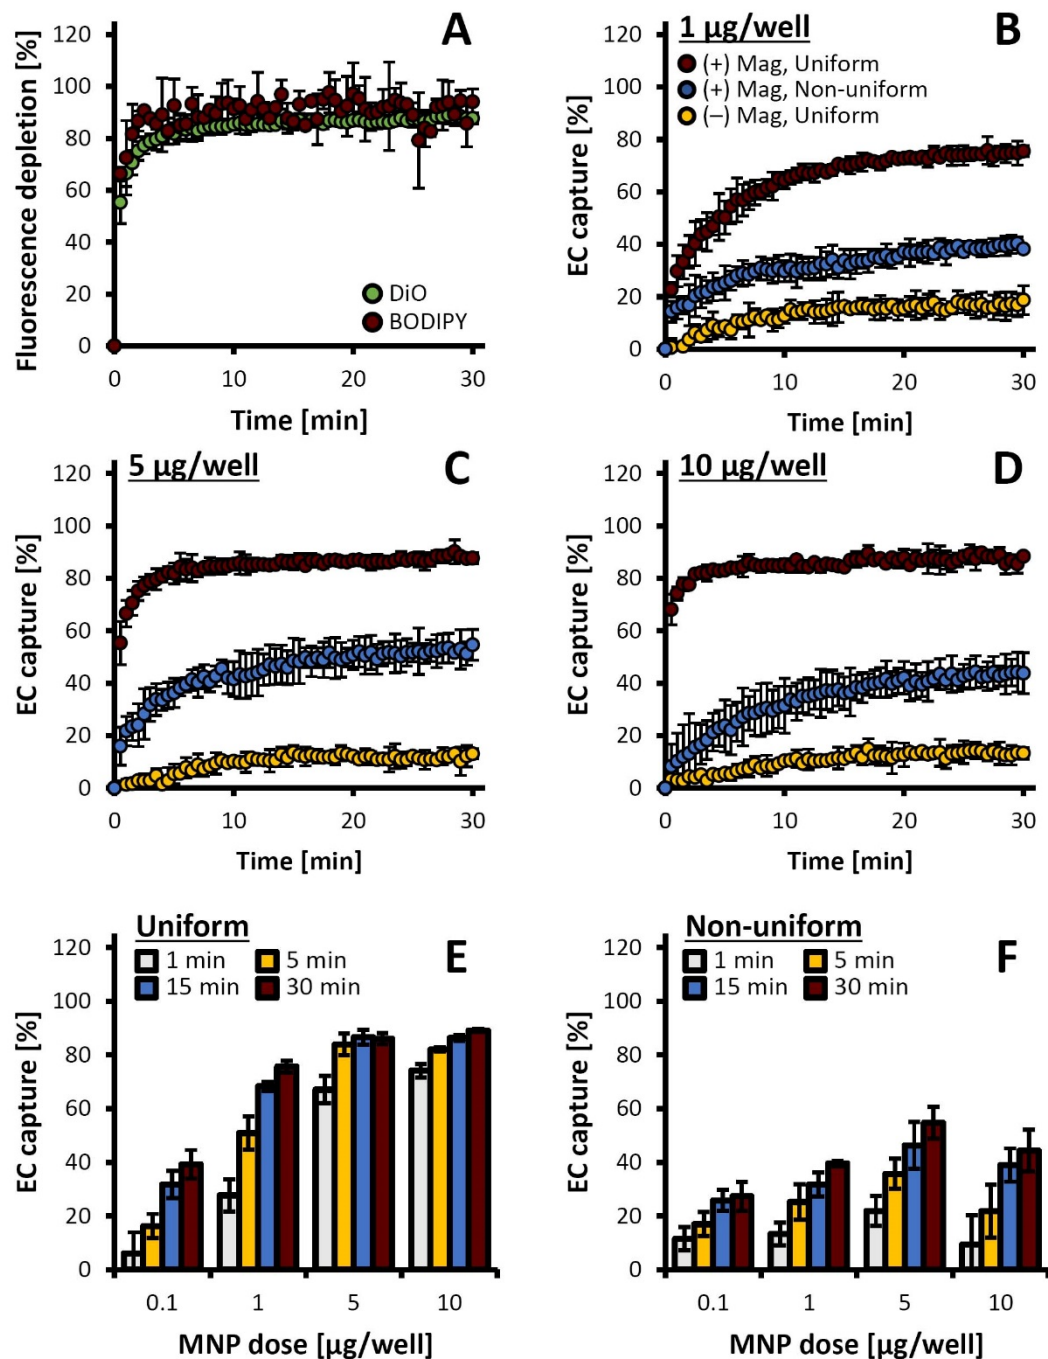

**Figure S4.** Magnetic responsiveness of MNP-loaded EC characterized using the depletion-based magnetophoresis assay. (A) The fluorescence of intracellular MNP labeled with BODIPY<sub>558/568</sub> and of EC labeled with DiO were monitored simultaneously. EC were loaded uniformly using 5  $\mu\text{g}$  of BODIPY<sub>558/568</sub>-labeled MNP per well. Data are presented as percent decrease of the initial fluorescence intensity. (B-D) Capture kinetics within and without the magnetic field exposure of EC loaded with (B) 1  $\mu\text{g}$  MNP/well, (C) 5  $\mu\text{g}$  MNP/well, and (D) 10  $\mu\text{g}$  MNP/well using the two cell loading procedures. (E-F) Cell capture efficiencies of EC shown as a function of MNP dose (0.1-10  $\mu\text{g/well}$ ) and magnetic exposure duration (1-30 min) are shown for EC loaded using the (E) optimized (uniform), and the (F) simulated, non-uniform loading procedures.
